# Supplementary material for: Impact of Whole Body Electromyostimulation on Velocity, Power and Body Composition in Postmenopausal Women: A Randomized Controlled Trial
Source: PubMed Central journal article supplement (PMC7400631; doi:10.3390/ijerph17144982), 2020-07-10
Supplement: ijerph-17-04982-s001.pdf [file ijerph-17-04982-s001.pdf]

**Table 1.** Summary of body composition results for each group EX + WB-EMS (n = 16) and EX (n = 16).

| Variable                 | $\Delta$ EX + WB-EMS | $\Delta$ EX  | MD [95% CI]             | <i>d</i>                |
|--------------------------|----------------------|--------------|-------------------------|-------------------------|
| Weight (kg)              | -0.44 ± 0.42         | -0.15 ± 0.42 | -0.29 [-1.60, 1.01]     | -0.17, [-0.87, 0.52]    |
| BMI (kg/m <sup>2</sup> ) | -0.18 ± 0.18         | -0.02 ± 0.18 | -0.16 [-0.70, 0.38]     | -0.22, [-0.92, 0.47]    |
| Body fat (%)             | -0.14 ± 0.49         | -0.43 ± 0.49 | 0.29 [-1.22, 1.81]      | 0.15, [-0.55, 0.84]     |
| Fat mass (kg)            | 0.54 ± 0.90          | -1.97 ± 0.90 | 2.51 [-0.29, 5.31]      | 0.70, [-0.02, 1.41]\$   |
| Lean mass (kg)           | -0.51 ± 0.49         | 1.10 ± 0.49  | -1.61 [-3.15, 0.07]*    | -0.82, [-1.54, -0.09]\$ |
| Visceral fat (kg)        | -0.40 ± 0.56         | -1.17 ± 0.56 | 0.77 [-1.03, 2.57]      | 0.34, [-0.36, 1.04]     |
| Abdominal fold (mm)      | -3.73 ± 1.20         | -0.03 ± 1.15 | -3.70 [-7.34, -0.06] *  | -0.77, [-1.50, -0.06]\$ |
| Waist to hip ratio       | -0.01 ± 0.02         | 0.06 ± 0.02  | -0.07 [-0.13, -0.02] *  | -0.87, [-1.60, -0.14]\$ |
| 6-fold (mm)              | -7.39 ± 4.19         | 3.36 ± 4.19  | -10.75 [-23.67, 2.18]   | -0.64, [-1.35, 0.08]\$  |
| Waist (cm)               | -1.31 ± 2.09         | 4.99 ± 2.09  | -6.30 [-12.84, 0.25]    | -0.75, [-1.47, -0.03]\$ |
| Hip (cm)                 | -4.35 ± 2.89         | 5.16 ± 2.89  | -9.51 [-18.66, -0.37] * | -0.82, [-1.54, -0.09]\$ |

Values are presented as estimated mean ± SE.  $\Delta$  EX + WB-EMS: change score of exercise plus whole-body electrostimulation group;  $\Delta$  EX: change score of exercise only group; MD: mean difference; CI: confidence interval; *d*: Cohen's *d* effect size; BMI: body mass index; \*:  $p_{\text{Bonferroni}} \leq 0.05$ ; \*\*:  $p_{\text{Bonferroni}} < 0.01$ ; \*\*\*:  $p_{\text{Bonferroni}} < 0.001$ ; \$: moderate effect size.

### Squat exercise

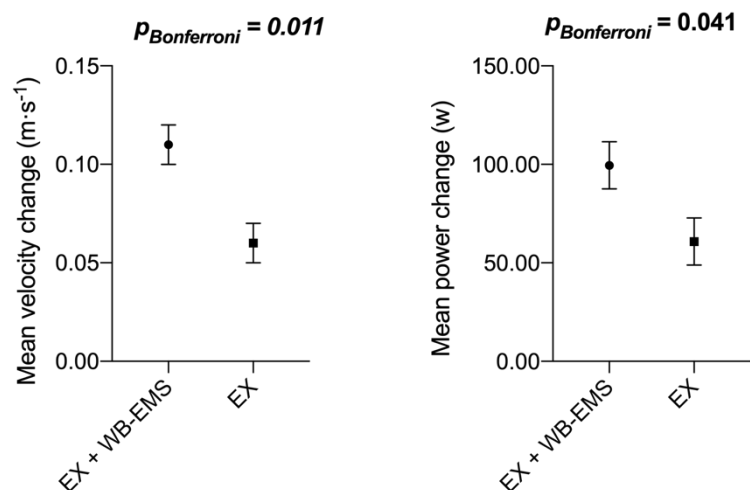

### Bench press exercise

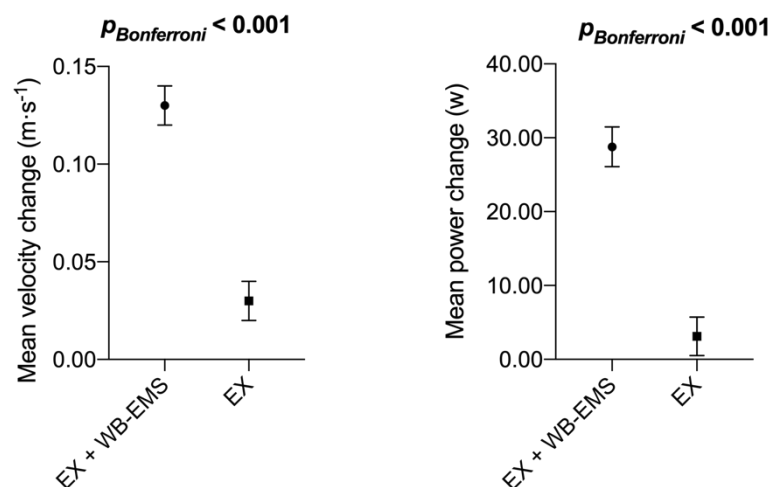

**Figure S1.** Analysis of covariance assessing differences in mechanical variables of strength exercises at the end of follow-up among intervention versus control groups. Estimated mean and 95% confidence intervals

(CIs; error bars) represent values after adjusting by age and the corresponding value of the mechanical variable at baseline. Statistically significant values are shown in bold.
